# Supplementary material for: Disease Perceptions, Risks, and Responses: Using the Health Belief Model to Understand Street Children and Youths Health-Seeking Behaviour in Cameroon
Source: Research Square preprint supplement (doi:10.21203/rs.3.rs-7474433/v1), 2025-11-18
Supplement: Supplementary file 1 [file 5f94735c9aa972702dc8dbef.docx]

Supplementary Table: Logistic regression analysis

|  |  |  |  |  |  |  |  |
| --- | --- | --- | --- | --- | --- | --- | --- |
|  |  |  | Coefficient (β) | Standard Error (ES) | OR (Odd Ratio) | IC 95 % (OR) | P-value |
|  |  |  |
|  | **Sociodemographic** | |  |  |  |  |  |
|  | Age |  | 0.08 | 0.05 | 1.08 | (0,99 - 1,19) | 0.11 |
|  | Education level (Ref: Secondary) | |  |  |  |  | 0.92 |
|  |  | Professional/ Technical | -14,46 | 1696.73 | - | - |  |
|  |  | No education | -0,06 | 0.77 | 0.95 | (0,21 - 4,30) |  |
|  |  | Primary | 0.05 | 0.64 | 1.05 | (0,30 - 3,69) |  |
|  | Having a job (Ref: Yes) | |  |  |  |  | 0.92 |
|  |  | No | 0.11 | 1.11 | 1.11 | (0,13 - 9,72) |  |
|  | Income (Ref: >50.000 XAF) | |  |  |  |  | 0.002 |
|  |  | <20.000 | -2,8 | 0.84 | 0.06 | (0,012 - 0,32) |  |
|  |  | 20000-50000 | -1,19 | 0.79 | 0.30 | (0,06 - 1,43) |  |
|  | **Street living conditions** | |  |  |  |  |  |
|  | In/outside (Ref: Inside) | |  |  |  |  | 0.09 |
|  |  | Outside | -1,76 | 0.96 | 0.17 | (0,03 - 1,13) |  |
|  | Time spent on the street (Ref: <1 year) | |  |  |  |  | 0.97 |
|  |  | ≥ 1 year | -0,03 | 0.6 | 0.96 | (0,32 - 3,00) |  |
|  | Time spent on the street (years) | | 0.05 | 0.06 | 1.05 | (0,93 - 1,17) | 0.46 |
|  | **Risk behaviours** | |  |  |  |  |  |
|  | Drug consumption (Ref: No) | |  |  |  |  | 0.92 |
|  |  | Yes | -0,06 | 0.56 | 0.94 | (0,31 - 2,83) |  |
|  | Alcohol consumption (Ref: No) | |  |  |  |  | 0.60 |
|  |  | Yes | 0.29 | 0.55 | 1.34 | (0,45 - 3,96) |  |
|  | Smoking (Ref: Never) | |  |  |  |  | 0.55 |
|  |  | Rarely | 0.04 | 0.8 | 1.04 | (0,20 - 5,42) |  |
|  |  | Often | -0,64 | 0.63 | 0.53 | (0,15 - 1,83) |  |
|  | Sexually active (Ref: No) | |  |  |  |  | 0.22 |
|  |  | Yes | 0.71 | 0.59 | 2.03 | (0,64 - 6,44) |  |
|  | Laboratory tests | |  |  |  |  |  |
|  | Malaria (Ref: negative) | |  |  |  |  | 0.54 |
|  |  | Positive | 0.35 | 0.56 | 1.42 | (0,46 - 4,39) |  |
|  | Helminths (Ref: Absence) | |  |  |  |  |  |
|  |  | Presence | - | - | - | - | - |
|  | Hepatitis B (Ref: Negative) | |  |  |  |  | 0.24 |
|  |  | Positive | 1.10 | 0.87 | 3.0 | (0,54 - 16,55) |  |
|  | HIV (Ref: Negative) | |  |  |  |  |  |
|  |  | Positive | - | - | - | - | - |
|  |  |  |  |  |  |  |  |
